# Supplementary material for: Probing the influence of strontium doping and annealing temperature on the structure and biocompatibility of hydroxyapatite nanorods
Source: Royal Society of Chemistry journal article supplement (doi:10.1039/d3dt04305c), 2024-01-01
Supplement: d3dt04305c1.pdf [file d3dt04305c1.pdf]

## Electronic Supplementary Information

### Probing the Influence of Strontium Doping and Annealing Temperature on Structure and Biocompatibility of Hydroxyapatite Nanorods

Harsha G. Patil<sup>1</sup>, S. Archana Rajendran<sup>2</sup>, Nibedita Lenka<sup>2</sup>, B Sachin Kumar<sup>3</sup>  
Selvakumar Murugesan<sup>1</sup>, S. Anandhan<sup>1\*</sup>

<sup>1</sup>Department of Metallurgical and Materials Engineering,  
National Institute of Technology Karnataka, Surathkal, Mangaluru – 575025, Karnataka, India.

<sup>2</sup>National Centre for Cell Science, S. P. Pune University Campus,  
Ganeshkhind, Pune - 411007, Maharashtra, India.

<sup>3</sup>Department of Mechanical Engineering, B.M.S. College of Engineering,  
Bengaluru – 560019, Karnataka, India.

Crystallographic information file (CIF) numbers: (a) 9002216 for HAp (b)7215687 for Sr-HAp.

**Table S1.** Molar ratios of Ca(NO<sub>3</sub>)<sub>2</sub>·4H<sub>2</sub>O, Sr(NO<sub>3</sub>)<sub>2</sub>, (NH<sub>4</sub>)<sub>2</sub>HPO<sub>4</sub> used in experiments, Ca/Sr ratio, chemical formula and abbreviations (M: molar; m: moles; g: grams).

| Sr. No                                                   | Ca(NO <sub>3</sub> ) <sub>2</sub> | Sr(NO <sub>3</sub> ) <sub>2</sub> | (NH <sub>4</sub> ) <sub>2</sub> HPO <sub>4</sub> | Ca:Sr molar ratio | (Ca+Sr)/P molar ratio | Wt. % of Sr doping | Chemical formula                                                                      | Sample designations         |
|----------------------------------------------------------|-----------------------------------|-----------------------------------|--------------------------------------------------|-------------------|-----------------------|--------------------|---------------------------------------------------------------------------------------|-----------------------------|
| 1                                                        | 0.50 M                            | 0.00 M                            | 0.30 M                                           | 10:00             | 1.66                  | 0                  | Ca <sub>10</sub> (PO <sub>4</sub> ) <sub>6</sub> (OH) <sub>2</sub>                    | HAp-UA, HAp-600, HAp-800    |
| 2                                                        | 0.45 M                            | 0.05 M                            | 0.3 M                                            | 09:01             | 1.66                  | 9.05%              | Ca <sub>9</sub> Sr <sub>1</sub> (PO <sub>4</sub> ) <sub>6</sub> (OH) <sub>2</sub>     | Sr1-UA, Sr1-600, Sr1-800    |
| 3                                                        | 0.25 M                            | 0.25 M                            | 0.3 M                                            | 05:05             | 1.66                  | 47.35%             | Ca <sub>5</sub> Sr <sub>5</sub> (PO <sub>4</sub> ) <sub>6</sub> (OH) <sub>2</sub>     | Sr5-UA, Sr5-600, Sr5-800    |
| 4                                                        | 0.15 M                            | 0.35 M                            | 0.3 M                                            | 03:07             | 1.66                  | 67.64%             | Ca <sub>3</sub> Sr <sub>7</sub> (PO <sub>4</sub> ) <sub>6</sub> (OH) <sub>2</sub>     | Sr7-UA, Sr7-600, Sr7-800    |
| 5                                                        | 0                                 | 0.5 M                             | 0.3 M                                            | 00:10             | 1.66                  | 100%               | Sr <sub>10</sub> (PO <sub>4</sub> ) <sub>6</sub> (OH) <sub>2</sub>                    | Sr10-UA, Sr10-600, Sr10-800 |
| 6                                                        | 0.46 M                            | 0.04 M                            | 0.3 M                                            | 9.2:0.8           | 1.66                  | 7.22%              | Ca <sub>9.2</sub> Sr <sub>0.8</sub> (PO <sub>4</sub> ) <sub>6</sub> (OH) <sub>2</sub> | Sr0.8-600                   |
| 7                                                        | 0.48 M                            | 0.02 M                            | 0.3 M                                            | 9.6:0.4           | 1.66                  | 3.60%              | Ca <sub>9.6</sub> Sr <sub>0.4</sub> (PO <sub>4</sub> ) <sub>6</sub> (OH) <sub>2</sub> | Sr0.4-600                   |
| Unannealed- (UA) Annealing temperature-600 °C and 800 °C |                                   |                                   |                                                  |                   |                       |                    |                                                                                       |                             |

**Table S2.** Rietveld refinement data calculated using X'pert high score plus 4.7. ICDD numbers of different phases, unit cell parameters, unit cell volume and microstrains of various samples.

|                |             | Standard values from ICDD                                                         |           |       |                         | After Rietveld Refinement |                    |                         |       |       | Crystallite Size measurement |                      |       |       |
|----------------|-------------|-----------------------------------------------------------------------------------|-----------|-------|-------------------------|---------------------------|--------------------|-------------------------|-------|-------|------------------------------|----------------------|-------|-------|
| Sample         | ICDD        | Chemical formula                                                                  | a = b (Å) | c (Å) | Volume (Å) <sup>3</sup> | a = b (Å)                 | c (Å)              | Volume (Å) <sup>3</sup> | Rwp   | GoF   | Microstrain (%)              | Crystallite Size (Å) | Rwp   | GoF   |
| <b>HAp-UA</b>  | 01-073-8419 | Ca <sub>5</sub> (PO <sub>4</sub> ) <sub>3</sub> (OH)                              | 9.4257    | 6.885 | 529.76                  | 9.45173±0.00667           | 6.89756±0.003690   | 533.6±0.46              | 18.37 | 0.963 | 0.125±0.0094                 | 306.9±0.59           | 18.68 | 0.977 |
| <b>HAp-600</b> | 01-073-8419 | Ca <sub>5</sub> (PO <sub>4</sub> ) <sub>3</sub> (OH)                              | 9.4257    | 6.885 | 529.76                  | 9.41705±0.00045           | 6.8850027±0.000225 | 528.58±0.03             | 6.982 | 2.098 | 0.16±0.00539                 | 368.9±5.47           | 6.734 | 2.023 |
| <b>HAp-800</b> | 01-073-8419 | Ca <sub>5</sub> (PO <sub>4</sub> ) <sub>3</sub> (OH)                              | 9.4257    | 6.885 | 529.76                  | 9.42143±0.00071           | 6.8863±0.000388    | 542.4±0.0047            | 5.524 | 1.63  | 0.108±0.0033                 | 529.15±1.33          | 5.388 | 1.593 |
| <b>Sr1-UA</b>  | 00-060-0648 | Ca <sub>9</sub> Sr(PO <sub>4</sub> ) <sub>6</sub> (OH) <sub>2</sub>               | 9.4706    | 6.923 | 537.77                  | 9.4494±0.01429            | 6.905±0.007784     | 533.96±1.00             | 17.47 | 0.94  | 0.194±0.0524                 | 277±26.94            | 17.66 | 0.973 |
| <b>Sr1-600</b> | 00-060-0648 | Ca <sub>9</sub> Sr(PO <sub>4</sub> ) <sub>6</sub> (OH) <sub>2</sub>               | 9.4706    | 6.923 | 537.77                  | 9.44403±0.00226           | 6.9072±0.001223    | 533.51±0.15             | 6.711 | 2.04  | 0.261±0.007                  | 288.7±4.74           | 7.79  | 2.37  |
| <b>Sr1-800</b> | 00-060-0648 | Ca <sub>9</sub> Sr(PO <sub>4</sub> ) <sub>6</sub> (OH) <sub>2</sub>               | 9.4706    | 6.923 | 537.77                  | 9.45326±0.00113           | 6.91215±0.000622   | 534.94±0.08             | 7.801 | 2.38  | 0.061±0.008                  | 404.8±5.03           | 6.7   | 2.04  |
| <b>Sr5-UA</b>  | 00-034-0483 | Ca <sub>8</sub> Sr <sub>2</sub> (PO <sub>4</sub> ) <sub>6</sub> (OH) <sub>2</sub> | 9.486     | 6.951 | 541.68                  | 9.51184±0.01672           | 6.9826±0.009351    | 547.14±1.20             | 15.09 | 0.909 | 0.397±0.057                  | 383.3±85.5           | 15.57 | 0.933 |
|                | 01-080-9970 | Sr <sub>10</sub> (PO <sub>4</sub> ) <sub>6</sub> (OH) <sub>2</sub>                | 9.7643    | 7.28  | 601.13                  | 9.7643±0.01877            | 7.2304±0.011001    | 598.05±1.46             | 15.09 | 0.909 | 0.314±0.077                  | 269.2±44.7           | 15.57 | 0.933 |
| <b>Sr5-600</b> | 00-034-0483 | Ca <sub>8</sub> Sr <sub>2</sub> (PO <sub>4</sub> ) <sub>6</sub> (OH) <sub>2</sub> | 9.486     | 6.951 | 541.68                  | 9.5145±0.00298            | 6.99±0.001751      | 547.99±0.19             | 5.66  | 1.928 | 0.445±0.009                  | 305.5±8.2            | 5.479 | 1.85  |
|                | 01-080-9970 | Sr <sub>10</sub> (PO <sub>4</sub> ) <sub>6</sub> (OH) <sub>2</sub>                | 9.7643    | 7.28  | 601.13                  | 9.7382±0.00273            | 7.24±0.00152       | 594.61±0.23             | 5.66  | 1.928 | 0.3±0.013                    | 245.8±5.24           | 5.479 | 1.85  |
| <b>Sr5-800</b> | 00-034-0483 | Ca <sub>8</sub> Sr <sub>2</sub> (PO <sub>4</sub> ) <sub>6</sub> (OH) <sub>2</sub> | 9.486     | 6.951 | 541.68                  | 9.5673±0.00088            | 7.04644±0.00535    | 558.57±0.06             | 6.871 | 2.3   | 0.3±0.0039                   | 362.5±0.978          | 6.862 | 2.29  |
|                | 01-080-9970 | Sr <sub>10</sub> (PO <sub>4</sub> ) <sub>6</sub> (OH) <sub>2</sub>                | 9.7643    | 7.28  | 601.13                  | 9.6236±0.00279            | 7.0952±0.001742    | 569.08±0.21             | 6.871 | 2.3   | 0.77±0.00015                 | 196.2±0.155          | 6.862 | 2.29  |
|                | 01-085-7551 | Sr <sub>7</sub> Ca <sub>3.5</sub> (PO <sub>4</sub> ) <sub>7</sub>                 | 10.662    | 38.94 | 3833.3                  | 10.6515±0.00118           | 38.7±0.004132      | 3802.52±0.58            | 6.871 | 2.3   | 0.174±0.0008                 | 429.9±1.631          | 6.862 | 2.29  |
| <b>Sr7-UA</b>  | 01-080-9970 | Sr <sub>10</sub> (PO <sub>4</sub> ) <sub>6</sub> (OH) <sub>2</sub>                | 9.7643    | 7.28  | 601.13                  | 9.6953±0.00186            | 7.1787±0.001028    | 584.39±0.13             | 6.83  | 2.91  | 0.348±0.0101                 | 167.8±1.809          | 7.341 | 3.31  |

|                 |             | Standard values from ICDD                                          |           |       |                         | After Rietveld Refinement |                  |                         |       |       | Crystallite Size measurement |                      |       |       |
|-----------------|-------------|--------------------------------------------------------------------|-----------|-------|-------------------------|---------------------------|------------------|-------------------------|-------|-------|------------------------------|----------------------|-------|-------|
| Sample          | ICDD        | Chemical formula                                                   | a = b (Å) | c (Å) | Volume (Å) <sup>3</sup> | a = b (Å)                 | c (Å)            | Volume (Å) <sup>3</sup> | Rwp   | GoF   | Microstrain (%)              | Crystallite Size (Å) | Rwp   | GoF   |
|                 | 01-085-7551 | Sr <sub>7</sub> Ca <sub>3.5</sub> (PO <sub>4</sub> ) <sub>7</sub>  | 10.662    | 38.94 | 3833.3                  | 10.78±0.00177             | 38.83±0.004922   | 3910.08±0.81            | 6.83  | 2.91  | 0.2±0.0102                   | 806.6±67.51          | 7.341 | 3.31  |
| <b>Sr7-600</b>  | 01-080-9970 | Sr <sub>10</sub> (PO <sub>4</sub> ) <sub>6</sub> (OH) <sub>2</sub> | 9.7643    | 7.28  | 601.13                  | 9.6898±0.00212            | 7.1751±0.001188  | 583.43±0.16             | 6.07  | 2.78  | 0.406±0.0102                 | 172.8±1.99           | 7.127 | 3.22  |
|                 | 01-085-7551 | Sr <sub>7</sub> Ca <sub>3.5</sub> (PO <sub>4</sub> ) <sub>7</sub>  | 10.662    | 38.94 | 3833.3                  | 10.7075±0.00194           | 39.0117±0.005399 | 3873.54±0.88            | 6.07  | 2.78  | 0.188±0.008                  | 901.5±72.8           | 7.127 | 3.22  |
| <b>Sr7-800</b>  | 01-085-7551 | Sr <sub>7</sub> Ca <sub>3.5</sub> (PO <sub>4</sub> ) <sub>7</sub>  | 10.662    | 38.94 | 3833.3                  | 10.69±0.0053              | 39.1±0.001433    | 3876.92±0.24            | 6.18  | 2.82  | 0.311±0.006                  | 810.5±13.73          | 6.197 | 3.12  |
|                 | 01-080-9970 | Sr <sub>10</sub> (PO <sub>4</sub> ) <sub>6</sub> (OH) <sub>2</sub> | 9.7643    | 7.28  | 601.13                  | 9.64750±0.00071           | 7.1508±0.000433  | 576.39±0.05             | 6.18  | 2.82  | 0.071±0.003                  | 295±4.98             | 6.197 | 3.12  |
| <b>Sr10-UA</b>  | 01-080-9970 | Sr <sub>10</sub> (PO <sub>4</sub> ) <sub>6</sub> (OH) <sub>2</sub> | 9.7643    | 7.28  | 601.13                  | 9.77311±0.00143           | 7.28155±0.00913  | 602.3±0.11              | 15.48 | 1.019 | 0.076±0.01974                | 492.9±4.55           | 15.4  | 1.01  |
| <b>Sr10-600</b> | 01-080-9970 | Sr <sub>10</sub> (PO <sub>4</sub> ) <sub>6</sub> (OH) <sub>2</sub> | 9.7643    | 7.28  | 601.13                  | 9.77065±0.00056           | 7.28194±0.00315  | 602.03±0.04             | 6.843 | 2.411 | 0.117±0.0022                 | 496.4±4.37           | 6.778 | 2.468 |
| <b>Sr10-800</b> | 01-080-9970 | Sr <sub>10</sub> (PO <sub>4</sub> ) <sub>6</sub> (OH) <sub>2</sub> | 9.7643    | 7.28  | 601.13                  | 9.77148±0.00032           | 7.2836±0.00185   | 602.27±0.02             | 7.218 | 2.16  | 0.043±0.0036                 | 583.8±4.54           | 6.937 | 2.449 |
|                 | 01-073-4870 | Sr <sub>3</sub> (PO <sub>4</sub> ) <sub>2</sub>                    | 5.3917    | 19.8  | 498.42                  | 5.39±0.00019              | 19.79±0.00626    | 498.16±0.02             | 7.218 | 2.16  | 0.046±0.0045                 | 812.2±14.9           | 6.937 | 2.449 |

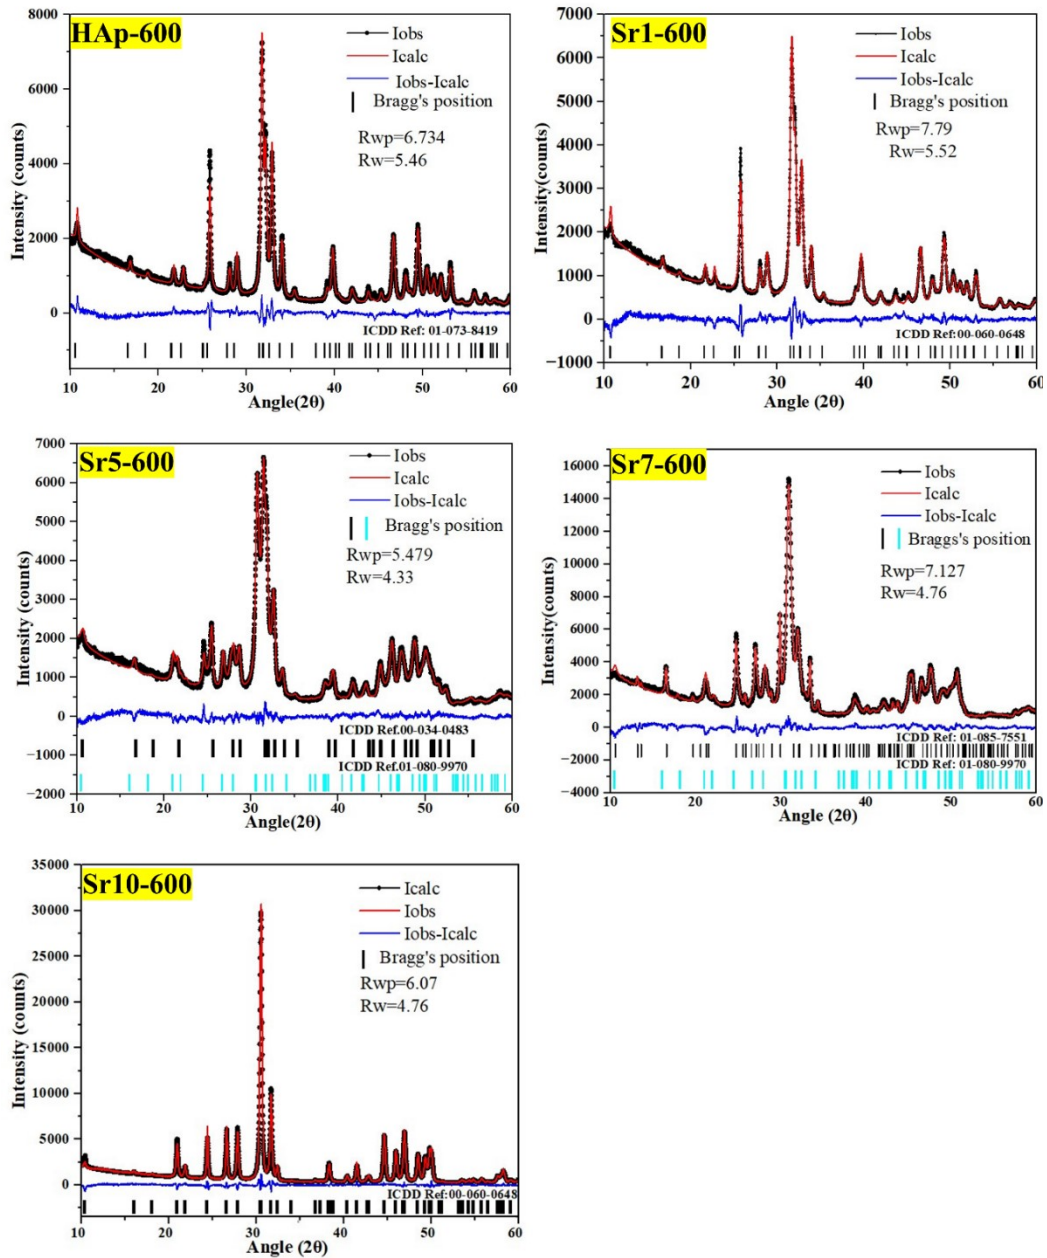

**Fig. S1** Rietveld refinement plots of samples annealed at 600°C.

### S 1. Measurement of average length, diameter and aspect ratio of the nanostructures

High magnification FESEM images were acquired at multiple locations for all the samples. The average length ( $L_{avg}$ ) and average diameters ( $D_{avg}$ ) were measured using Image-J 1.46r software. One such example is given below for the sample HAp-600. The yellow lines within the circles indicate length and diameters of the nanoparticles.

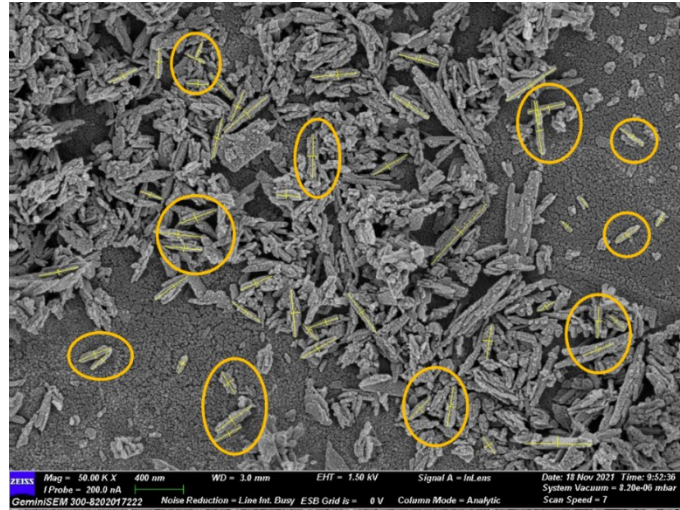

Fig. S2 Length and diameter measurement of the nanostructures.

Table S3. Average length, average diameter and aspect ratios of all the samples.

| Samples  | $L_{avg}$ (nm) | $D_{avg}$ (nm) | Aspect Ratio<br>( $L_{avg}/D_{avg}$ ) |
|----------|----------------|----------------|---------------------------------------|
| HAp-UA   | 276.8±105      | 58.8±14        | 4.70±1.3                              |
| Sr1-UA   | 142.5±87       | 34.0±18        | 4.18±1.5                              |
| Sr5-UA   | 131.6±57       | 37.1±12        | 3.5±1.9                               |
| Sr7-UA   | 143.9±61       | 44.3±14        | 3.2±1.5                               |
| Sr10-UA  | 195.4±150      | 160.2±107      | 1.2±0.3                               |
| HAp-600  | 195.5±72       | 53.1±18        | 3.6±1.5                               |
| Sr1-600  | 224.2±78       | 56.0±18        | 4.0±1.7                               |
| Sr5-600  | 201.1±57       | 41.4±11        | 4.8±1.6                               |
| Sr7-600  | 144.6±62       | 44.4±14        | 3.2±1.2                               |
| Sr10-600 | 275.4±110      | 166.9±78       | 1.6±0.67                              |
| HAp-800  | 89.6±50        | 36.1±20        | 2.4±0.61                              |
| Sr1-800  | 253.8±83       | 93.3±26        | 2.7±0.69                              |
| Sr5-800  | 291.2±97       | 120.0±31       | 2.4±0.88                              |
| Sr7-800  | 285.0±124      | 167.9±60       | 1.6±0.58                              |
| Sr10-800 | 283.1±107      | 152.2±75       | 1.8±0.82                              |

**Table S4.** Raman band positions, modes and assignments for Sr-HAp nanostructures annealed at UA, 600 °C and 800 °C.

| Assignment                                              | HAp-UA | Sr1-UA | Sr5-UA | Sr7-UA | Sr10-UA | HAp-600 | Sr1-600 | Sr5-600 | Sr7-600 | Sr10-600 | HAp-800 | Sr1-800 | Sr5-800 | Sr7-800 | Sr10-800 |
|---------------------------------------------------------|--------|--------|--------|--------|---------|---------|---------|---------|---------|----------|---------|---------|---------|---------|----------|
| Ca-PO <sub>4</sub>                                      | 140    | 140    | 140    | 139    | 130     | 140     | 139     | 141     | 140     | 128      | 140     | 139     | 139     | 139     | 140      |
|                                                         | 205    | 205    | 198    | 197    | 193     | 205     | 208     | 198     | 169     | 191      | 209     | 203     | 184     | 185     | 191      |
|                                                         | 289    | 285    | 273    | 251    | 225     | 291     | 287     | 277     | 251     | 215      | 289     | 279     | 266     | 260     | 238      |
| Ca-OH, $\nu_3$                                          | 329    | 328    | 316    | 315    | 315     | 334     | 330     | 324     | 320     | 317      | 330     | 332     | 319     | 319     | 314      |
| PO <sub>4</sub> <sup>3-</sup> bend, $\nu_2$             | 431    | 431    | 428    | 423    | 422     | 431     | 430     | 426     | 424     | 424      | 431     | 430     | 423     | 423     | 417      |
| PO <sub>4</sub> <sup>3-</sup> bend, $\nu_4$             | 592    | 591    | 588    | 585    | 581     | 592     | 591     | 588     | 587     | 580      | 592     | 592     | 586     | 585     | 606      |
|                                                         | 608    | 607    | 604    | 598    | 595     | 608     | 607     | 601     | 597     | 596      | 606     | 606     | 601     | 600     | 579      |
| PO <sub>4</sub> <sup>3-</sup> sym. stretch, $\nu_1$     | 962    | 961    | 957    | 953    | 948     | 962     | 961     | 957     | 953     | 948      | 961     | 960     | 955     | 955     | 947      |
| PO <sub>4</sub> <sup>3-</sup> Asym. stretching, $\nu_3$ | 1048   | 1047   | 1045   | 1039   | 1050    | 1048    | 1047    | 1042    | 1034    | 1051     | 1047    | 1046    | 1036    | 1032    | 1036     |
| OH <sup>-</sup> stretching mode                         | 3573   | 3572   | 3576   | 3584   | 3593    | 3573    | 3573    | 3577    | 3590    | 3594     | 3573    | 3573    | 3583    | 3589    | 3593     |

## S2. BET surface area analysis

The nitrogen adsorption/desorption analysis was performed to find the specific surface area of the samples (Sr-HAp samples annealed at 600°C) by Brunauer-Emmett-Teller (BET) method. The pore parameters (pore volume and pore radius) were evaluated from the desorption branch of isotherm based on Barrett–Joyner–Halenda (BJH) model using Autosorb IQ-XR, Anton Paar, Austria.

The detailed parameters of the pores dispersed on the nanoparticles (HAp-600 and its doped versions) were determined by N<sub>2</sub> adsorption method. Figure S2 shows the adsorption-desorption isotherms exhibiting the typical characteristics of a type IV curve with a hysteresis loop, signalling the mesoporous quality of Sr-HAp particles.<sup>1</sup> The values of pore volume and specific surface area (SSA) of nanoparticles are shown in table S5. From The highest and the lowest SSA were found to be 36.07 (m<sup>2</sup>/g) and 25.22 (m<sup>2</sup>/g) for HAp-600 and Sr10-600, respectively. It is important to note that as the dopant level increases in HAp, the surface area decreases. This might be due the change in the morphology from rod to sheet shape. In

addition, with the increase in the dopant level, both pore volume and pore radius increased until Sr5-600 and then decreased. This might be due to creation of defects within the sample.<sup>2</sup>

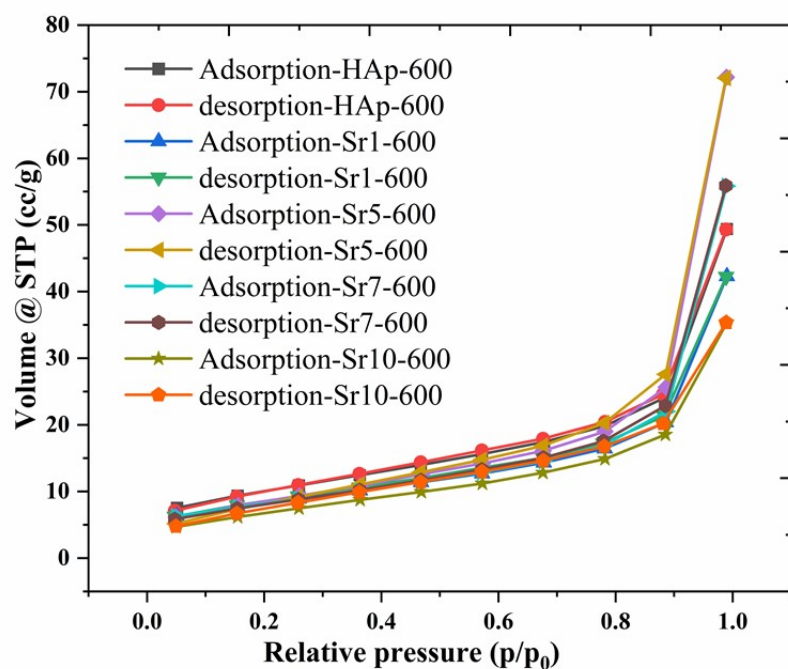

**Fig. S3** Nitrogen adsorption–desorption isotherms of various Sr-HAp nanoparticles annealed at 600°C.

**Table S5.** Specific surface area, pore size and pore volume of various Sr-HAp nanoparticles annealed at 600°C.

|                                 | <b>HAp-600</b> | <b>Sr1-600</b> | <b>Sr5-600</b> | <b>Sr7-600</b> | <b>Sr10-600</b> |
|---------------------------------|----------------|----------------|----------------|----------------|-----------------|
| <b>Average pore Radius (Å)</b>  | 42.38          | 44.53          | 71.67          | 59.53          | 43.38           |
| <b>SSA (m<sup>2</sup>/g)</b>    | 36.07          | 29.40          | 31.16          | 29.02          | 25.23           |
| <b>Total pore volume (cc/g)</b> | 0.076          | 0.066          | 0.12           | 0.086          | 0.055           |

**Table S6.** Cell viability data.

| <b>Samples</b> | <b>2.5%</b> | <b>5%</b> |
|----------------|-------------|-----------|
| Control        | 100         | 100       |
| HAp-600        | 71          | 28        |
| Sr0.4-600      | 88          | 75        |
| Sr0.8-600      | 90          | 59        |
| Sr1-600        | 87          | 26        |
| Sr5-600        | 85          | 58        |
| Sr7-600        | 71          | 66        |
| Sr10-600       | 69          | 56        |

## References

1. C. Shamitha, T. Senthil, L. Wu, B. S. Kumar and S. Anandhan, *J. Mater. Sci. Mater. Electron.*, 2017, **28**, 15846–15860.
2. H. Klym, I. Karbovnyk, A. Luchechko, Y. Kostiv, V. Pankratova and A. I. Popov, *Crystals*, 2021, **11**, 1515-1530.
